# Supplementary material for: Sen1 has unique structural features grafted on the architecture of the Upf1‐like helicase family
Source: PubMed Central journal article supplement (PMC5452015; doi:10.15252/embj.201696174), 2017-04-13
Supplement: EMBJ-36-1590-s001.pdf [file EMBJ-36-1590-s001.pdf]

## **Appendix:**

### **Sen1 has unique structural features grafted on the architecture of the Upf1-like helicase family**

#### **Supplementary information:**

Figure S1

Table S1

Supplementary Methods

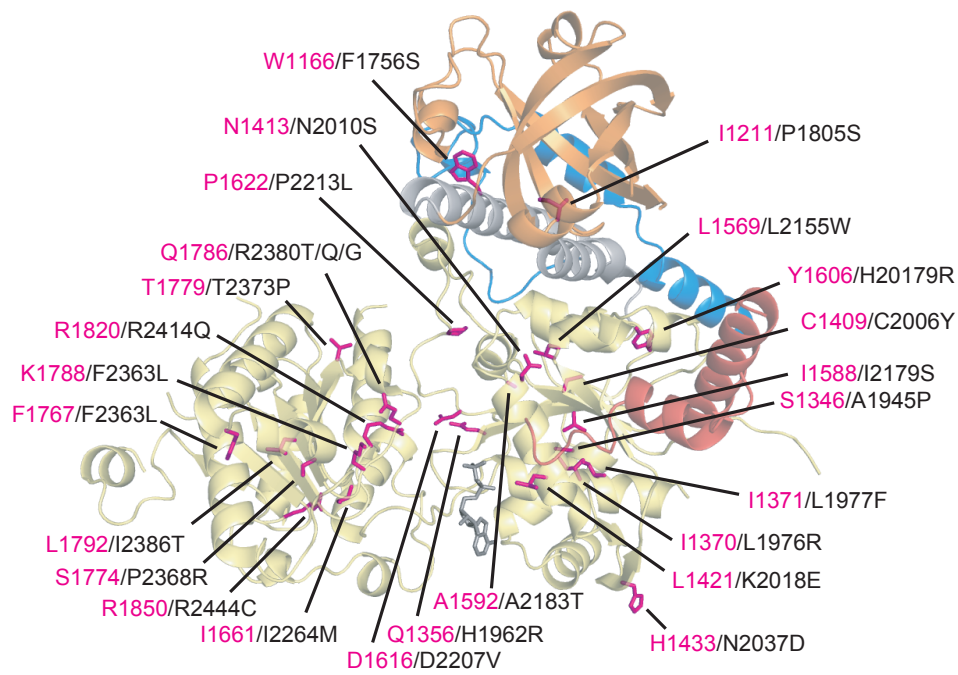

**Figure S1 - AOA2-associated missense mutations.**

Conserved AOA2-associated mutations mapped on the Sen1<sub>Hel</sub> structure. The residues that represent SETX missense mutations (black labels) are shown as sticks in magenta.

**Table S1: List of oligonucleotides used in this work.**

| Name   | Sequence (5'-3')                                                                                           | Information/use                                                                                                                                            |
|--------|------------------------------------------------------------------------------------------------------------|------------------------------------------------------------------------------------------------------------------------------------------------------------|
| DL1119 | AAGTGACGAAGTTCATGCTA                                                                                       | Forward oligo to generate by PCR a probe to detect snR13 read-through region.                                                                              |
| DL1154 | CCTATAACAACAACAACATG                                                                                       | Forward oligo to generate by PCR a probe to detect snR47 RNA.                                                                                              |
| DL1157 | ATAGCCATTAGTAAGTACGC                                                                                       | Reverse oligo to generate by PCR a probe to detect snR47 RNA.                                                                                              |
| DL1367 | GGCCCAACAGTATATTCATATCC                                                                                    | Reverse oligo to generate by PCR a probe to detect snR13 read-through region.                                                                              |
| DL2492 | UGCAUUUCGACCAGGC                                                                                           | 16-mer RNA oligonucleotide used for promoter-independent assembly of ECs. 5'-end FAM labeled.                                                              |
| DL2661 | TAATACGACTCACTATAGGGGACCG<br>GATGAGCGGTATTGAGTTTGAATTT<br>ATCGATGGTATCAGATCTGGATCCT<br>CGAGAAGCTGCGGGTACC  | Non-template strand to produce by <i>in vitro</i> transcription the 75-mer RNA component of RNA:DNA duplexes used in unwinding assays in figure 6.         |
| DL2662 | GGTACCCGCAGCTTCTCGAGGATCC<br>AGATCTGATAACCATCGATAAATTCA<br>AACTCAATACCGCTCATCCGGTCCC<br>CTATAGTGAGTCGTATTA | Template strand to produce by <i>in vitro</i> transcription the 75-mer RNA component of RNA:DNA duplexes used in unwinding assays in figure 6.             |
| DL3316 | UUCAUUUCAGACCAGCACCCACUC<br>ACUACAACUCACGACCAGGC                                                           | 44-mer RNA oligonucleotide used to form the RNA:DNA duplexes used in unwinding assays in figures 1, 5 and EV1.                                             |
| DL3352 | CTAGAGGAAACAAACTATAGGAAA<br>CGACCAGGCCCTCAACATCTCTCAC<br>CCATCTCCACACGGGGGTTACCCGG<br>CCTGCA               | Non-template strand used in IVTT assays. Labeled with biotin at the 5'-end.                                                                                |
| DL3353 | GGCCGGGTAACCCCGTGTGGAGAT<br>GGGTGAGAGATGTTGAGGGCCTGGT<br>CGTTTCTATAGTTTGTTCCT                              | Template strand used in IVTT assays. Labeled with biotin at the 5'-end.                                                                                    |
| DL3522 | GGTACCCGCAGCTTCTCGAG                                                                                       | Short oligonucleotide for forming the RNA:DNA duplex containing a 5' single-strand overhang used in unwinding assays in figure 6.                          |
| DL3791 | GCCTGGTCGTGAGTTGTAG                                                                                        | Short oligonucleotide that annealed to DL3316 forms the RNA:DNA duplex used in unwinding assays in figures 1 and 6. 5'-end FAM labeled.                    |
| DL3810 | GCCTGGTCGTGAGTTGTAG                                                                                        | Same sequence as DL3791 but without the FAM label. Used as a competitor to prevent reannealing of the unwound oligo.                                       |
| DL3841 | GGTGCTGGTCTGAAATGAA                                                                                        | Short oligonucleotide that annealed to DL3316 forms an RNA:DNA duplex containing a 3' overhang used in unwinding assays in figure EV1. 5'-end FAM labeled. |
| DL3842 | GGTGCTGGTCTGAAATGAA                                                                                        | Same sequence as DL3841 but without the FAM label. Used as a competitor to prevent reannealing of the unwound oligo.                                       |
| ARE    | UUUCUAUUUAUUUUG                                                                                            | 15-mer RNA oligonucleotide used for fluorescence anisotropy measurements. 5'-end FL labeled.                                                               |

## **Supplementary Methods:**

### **Electrophoretic mobility shift assay**

Assays were performed in 10  $\mu$ l-reactions containing 10 mM Tris-HCl pH 7.5, 70 mM NaCl, 2 mM MgCl<sub>2</sub>, 7.5  $\mu$ M ZnCl<sub>2</sub>, 10  $\mu$ g/ml BSA, 10% glycerol and 1 mM DTT. The RNA substrate (2 nM final concentration) was incubated with increasing concentrations of Sen1<sub>Hel</sub> variants at 28°C for 15 min. Reactions were loaded on 6% native polyacrylamide gels and subjected to electrophoresis in 0.5XTBE at 100V for 80 min. Gels were scanned directly using a Typhoon scanner (GE Healthcare).

### **RNA expression analyses**

RNAs were prepared using standard methods. Samples were separated by electrophoresis on 1.2% agarose gels, and then transferred to nitrocellulose membranes and crosslinked. Radiolabeled probes were prepared by random priming of PCR products covering the regions of interest with Megaprime kit (GE Healthcare) in the presence of  $\alpha$ -<sup>32</sup>P dCTP (3000 Ci/mmol). Oligonucleotides used to generate the PCR probes are listed in the Appendix Table S1. Hybridizations were performed using a commercial buffer (Ultrahyb, Ambion) and after washes, membranes were analysed by phosphorimaging.
