# Supplementary material for: Sen1 has unique structural features grafted on the architecture of the Upf1‐like helicase family
Source: PubMed Central journal article supplement (PMC5452015; doi:10.15252/embj.201696174), 2017-04-13

Figure 4B left

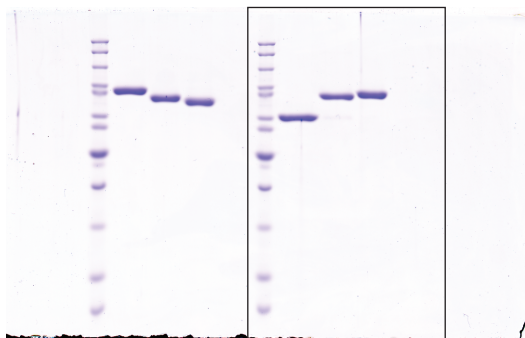

Figure 4B right

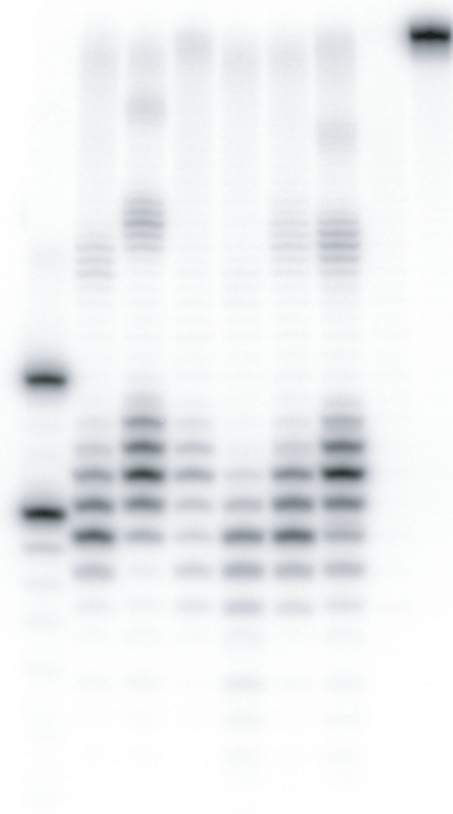

Supplement: EMBJ-36-1590-s004.pdf [file EMBJ-36-1590-s004.pdf]
